# Supplementary material for: Conserved Noncoding Sequences Regulate lhx5 Expression in the Zebrafish Forebrain
Source: PLoS One. 2015 Jul 6;10(7):e0132525. doi: 10.1371/journal.pone.0132525 (PMC4492605; doi:10.1371/journal.pone.0132525)
Supplement: S4 Table — (XLSX) [file pone.0132525.s007.xlsx]

## Sheet: tailPCR
	Primer sequences (5'-3')
LAD1	ACGATGGACTCCAGAGCGGCCGC(G/C/A)N(G/C/A)NNNGGAA;
LAD2	ACGATGGACTCCAGAGCGGCCGC(G/C/T)N(G/C/T)NNNGGTT;
LAD3	ACGATGGACTCCAGAGCGGCCGC(G/C/A)(G/C/A)N(G/C/A)NNNCCAA;
LAD4	ACGATGGACTCCAGAGCGGCCGC(G/C/T)(G/A/T)N(G/C/T)NNNCGGT;
AC1	ACGATGGACTCCAGAG
mapLa	GAAAATAGAATGAAGTGATCTCC
Tag-mapLb	ACGATGGACTCCAGTCCGGCCCTTTTTGACTGTAAATAAAATTGTAAGGAGTA
mapLc	AATGTAATTAAGTAAAAGTAAAAGTATTG
mapR1	CCAGCTTAAACAAGAATCTCTAGT
Tag-mapR2	ACGATGGACTCCAGTCCGGCCTTCTTTCTTGCTTTTACTTTTACTTCC
mapR3	CCTTAATACTCAAGTACAATTTTAATGGAGT
